# Supplementary material
Source: HighWire-hosted journal article supplement (https://bmjopen.bmj.com/content/10/9/e035893)
Supplement: inline-supplementary-material-1 [file inline-supplementary-material-1.pdf]

## Supplementary files

Table S1 Variables associated with developing subsequent CRAB infection during the ICU stay using sub-distribution hazard model (exposed group was those patients with intestinal carriage on ICU admission)

| Item                            | Subsequent CRAB infection during the ICU stay |                   | Univariate analysis    |                  | Multivariate analysis   |                  |
|---------------------------------|-----------------------------------------------|-------------------|------------------------|------------------|-------------------------|------------------|
|                                 | Yes (n=80)                                    | No (n=766)        | SDHR (95% CI)          | P                | SDHR (95% CI)           | P                |
| <b>CRAB intestinal carriage</b> | <b>19 (23.75%)</b>                            | <b>47 (6.14%)</b> | 3.78(2.20-6.49)        | <b>&lt;0.001</b> | <b>3.42 (1.88-6.22)</b> | <b>&lt;0.001</b> |
| Demographics                    |                                               |                   |                        |                  |                         |                  |
| Sex, male                       | 50 (62.50%)                                   | 499 (65.14%)      | 1.15(0.73-1.80)        | 0.55             |                         |                  |
| Ethnicity, Han Chinese          | 77 (96.25%)                                   | 697 (90.99%)      | 2.54(0.78-8.24)        | 0.12             |                         |                  |
| Age (median)                    | 54 (42-68)                                    | 55 (44-68)        | 1.00(0.99-1.02)        | 0.85             |                         |                  |
| <b>APACHE II</b>                | <b>20 (15-26)</b>                             | <b>17 (12-22)</b> | <b>1.06(1.03-1.08)</b> | <b>&lt;0.001</b> | <b>1.03 (1.00-1.05)</b> | <b>0.045</b>     |
| Charlson score                  | 3 (1-5)                                       | 3 (2-4)           | 1.00(0.88-1.13)        | 1.00             |                         |                  |
| Underlying disease              |                                               |                   |                        |                  |                         |                  |
| Peripheral vascular disease     | 11 (13.75%)                                   | 57 (7.44%)        | 1.62(0.85-3.10)        | 0.14             |                         |                  |
| Cerebrovascular disease         | 3 (3.75%)                                     | 33 (4.31%)        | 0.87(0.29-2.66)        | 0.81             |                         |                  |
| Connective tissue disease       | 1 (1.25%)                                     | 11 (1.44%)        | 0.78(0.11-5.73)        | 0.80             |                         |                  |
| Peptic ulcer                    | 3 (3.75%)                                     | 23 (3.00%)        | 1.19(0.41-3.46)        | 0.74             |                         |                  |
| Hypertension                    | 18 (22.50%)                                   | 173 (22.58%)      | 0.97(0.58-1.64)        | 0.91             |                         |                  |
| Tuberculosis                    | 1 (1.25%)                                     | 12 (1.57%)        | 0.72(0.10-5.37)        | 0.75             |                         |                  |
| <b>COPD</b>                     | <b>11 (13.75%)</b>                            | <b>45 (5.87%)</b> | <b>2.21(1.15-4.24)</b> | <b>0.017</b>     | <b>2.71 (1.40-5.24)</b> | <b>0.003</b>     |
| Respiratory failure             | 34 (42.50%)                                   | 143 (18.67%)      | 2.38(1.52-3.72)        | <b>&lt;0.001</b> |                         |                  |
| Kidney failure                  | 5 (6.25%)                                     | 35 (4.57%)        | 1.13(0.474-2.7)        | 0.78             |                         |                  |
| Heart failure                   | 2 (2.50%)                                     | 21 (2.74%)        | 1.05(0.28-3.92)        | 0.95             |                         |                  |

|                       |                    |                     |                        |                  |                         |                  |
|-----------------------|--------------------|---------------------|------------------------|------------------|-------------------------|------------------|
| Diabetes              | 11 (13.75%)        | 101 (13.19%)        | 1.03(0.54-1.98)        | 0.92             |                         |                  |
| Liver dysfunction     | <b>14 (17.50%)</b> | <b>32 (4.18%)</b>   | <b>3.59(2.00-6.45)</b> | <b>&lt;0.001</b> | <b>2.35 (1.30-4.25)</b> | <b>0.005</b>     |
| Hematological disease | 42 (52.50%)        | 261 (34.07%)        | 1.84(1.19-2.85)        | <b>0.006</b>     |                         |                  |
| Pancreatitis          | 17 (21.25%)        | 84 (10.97%)         | 1.91(1.13-3.22)        | <b>0.016</b>     |                         |                  |
| Medical operation     |                    |                     |                        |                  |                         |                  |
| Surgery               | 62 (77.50%)        | 638 (83.29%)        | 0.83(0.49-1.42)        | 0.50             |                         |                  |
| CVC                   | 61 (76.25%)        | 414 (54.05%)        | 2.23(1.33-3.74)        | <b>0.002</b>     |                         |                  |
| Ventilator            | 72 (90.00%)        | 648 (84.60%)        | 1.62(0.80-3.25)        | 0.18             |                         |                  |
| Indwelling catheter   | 78 (97.50%)        | 729 (95.17%)        | 1.91(0.53-6.94)        | 0.32             |                         |                  |
| Tube feeding          | 54 (67.50%)        | 265 (34.60%)        | 2.71(1.69-4.34)        | <b>&lt;0.001</b> |                         |                  |
| Nebulizer fiberoptic  | 51 (63.75%)        | 349 (45.56%)        | 1.35(0.86-2.12)        | 0.19             |                         |                  |
| Bronchoscope          | 5 (6.25%)          | 17 (2.22%)          | 1.85(0.77-4.46)        | 0.17             |                         |                  |
| Antimicrobial use     |                    |                     |                        |                  |                         |                  |
| Cephalosporin         | <b>15 (18.75%)</b> | <b>210 (27.42%)</b> | <b>0.54(0.31-0.95)</b> | <b>0.032</b>     | <b>0.43(0.24-0.78)</b>  | <b>0.006</b>     |
| Vancomycin            | 2 (2.50%)          | 28 (3.66%)          | 0.70(0.16-2.98)        | 0.63             |                         |                  |
| Aminoglycosides       | 1 (1.25%)          | 15 (1.96%)          | 0.50(0.07-3.52)        | 0.48             |                         |                  |
| Carbapenems           | <b>58 (72.50%)</b> | <b>284 (37.08%)</b> | <b>3.57(2.18-5.85)</b> | <b>&lt;0.001</b> | <b>2.61(1.53-4.46)</b>  | <b>&lt;0.001</b> |
| Fluoroquinolones      | 21 (26.25%)        | 127 (16.58%)        | 1.07(0.66-1.74)        | 0.79             |                         |                  |
| Antifungal agents     | 17 (21.25%)        | 123 (16.06%)        | 1.26(0.74-2.12)        | 0.39             |                         |                  |
| Cephamecins           | 12 (15.00%)        | 179 (23.37%)        | 0.52(0.28-0.96)        | <b>0.036</b>     |                         |                  |
| Lincomycin            | 3 (3.75%)          | 32 (4.18%)          | 0.84(0.26-2.68)        | 0.76             |                         |                  |
| Tigecycline           | 8 (10.00%)         | 53 (6.92%)          | 1.36(0.67-2.76)        | 0.39             |                         |                  |

COPD, chronic obstructive pulmonary disease. CVC, central venous catheter.

Variables with  $P < 0.05$  in the multivariate COX analysis are highlighted in bold.

Table S2. Variables associated with developing subsequent CRAB infection during the ICU stay using sub-distribution hazard model (exposed group was those patients with ICU acquisition of CRAB intestinal carriage)

| Item                        | Subsequent CRAB infection during the ICU stay |                     | Univariate analysis    |                  | Multivariate analysis   |              |
|-----------------------------|-----------------------------------------------|---------------------|------------------------|------------------|-------------------------|--------------|
|                             | Yes (n=93)                                    | No (n=802)          | <i>SDHR (95% CI)</i>   | <i>P</i>         | <i>SDHR (95% CI)</i>    | <i>P</i>     |
| CRAB intestinal carriage    | <b>32 (34.41%)</b>                            | <b>83 (10.35%)</b>  | <b>2.35(1.56-3.55)</b> | <b>&lt;0.001</b> | <b>1.81 (1.15-2.86)</b> | <b>0.011</b> |
| Demographics                |                                               |                     |                        |                  |                         |              |
| Sex, male                   | 60 (64.52%)                                   | 513 (63.97%)        | 1.01(0.66-1.55)        | 0.95             |                         |              |
| Ethnicity, Han Chinese      | 87 (93.55%)                                   | 731 (91.15%)        | 1.32(0.56-3.08)        | 0.52             |                         |              |
| Age (median)                | 54 (44-68)                                    | 55 (45-68)          | 1.00(0.99-1.01)        | 0.70             |                         |              |
| APACHE II                   | 21 (18-26)                                    | 17 (12-22)          | 1.05(1.03-1.07)        | <0.001           |                         |              |
| Charlson score              | 3 (1-5)                                       | 3 (2-4)             | 1.01(0.91-1.13)        | 0.80             |                         |              |
| Underlying disease          |                                               |                     |                        |                  |                         |              |
| Peripheral vascular disease | 11 (11.83%)                                   | 62 (7.73%)          | 1.34(0.71-2.53)        | 0.37             |                         |              |
| Cerebrovascular disease     | 4 (4.30%)                                     | 36 (4.49%)          | 1.03(0.39-2.73)        | 0.96             |                         |              |
| Connective tissue disease   | 1 (1.08%)                                     | 12 (1.50%)          | 0.68(0.09-5.07)        | 0.70             |                         |              |
| Peptic ulcer                | 4 (4.30%)                                     | 26 (3.24%)          | 1.39(0.58-3.33)        | 0.46             |                         |              |
| Hypertension                | 25 (26.88%)                                   | 191 (23.82%)        | 1.10(0.69-1.74)        | 0.70             |                         |              |
| Tuberculosis                | 2 (2.15%)                                     | 11 (1.37%)          | 1.41(0.32-6.29)        | 0.65             |                         |              |
| COPD                        | 10 (10.75%)                                   | 54 (6.73%)          | 1.37(0.69-2.75)        | 0.37             |                         |              |
| Respiratory failure         | <b>44 (47.31%)</b>                            | <b>159 (19.83%)</b> | <b>2.42(1.59-3.69)</b> | <b>&lt;0.001</b> | <b>1.84 (1.17-2.90)</b> | <b>0.009</b> |
| Kidney failure              | 7 (7.53%)                                     | 35 (4.36%)          | 1.56(0.75-3.28)        | 0.24             |                         |              |

|                       |                    |                     |                        |                  |                         |              |
|-----------------------|--------------------|---------------------|------------------------|------------------|-------------------------|--------------|
| Heart failure         | 3 (3.23%)          | 24 (2.99%)          | 1.34(0.47-3.82)        | 0.58             |                         |              |
| Diabetes              | 11 (11.83%)        | 112 (13.97%)        | 0.75(0.40-1.39)        | 0.36             |                         |              |
| Liver dysfunction     | <b>13 (13.98%)</b> | <b>29 (3.62%)</b>   | <b>3.18(1.74-5.81)</b> | <b>&lt;0.001</b> | <b>2.13(1.05-4.32)</b>  | <b>0.037</b> |
| Hematological disease | 49 (52.69%)        | 290 (36.16%)        | 1.60(1.06-2.40)        | 0.025            |                         |              |
| Pancreatitis          | 20 (21.51%)        | 92 (11.47%)         | 1.71(1.06-2.76)        | 0.028            |                         |              |
| Medical operation     |                    |                     |                        |                  |                         |              |
| Surgery               | 70 (75.27%)        | 666 (83.04%)        | 0.78(0.49-1.27)        | 0.32             |                         |              |
| CVC                   | 68 (73.12%)        | 434 (54.11%)        | 1.82(1.15-2.88)        | 0.011            |                         |              |
| Ventilator            | 85 (91.40%)        | 683 (85.16%)        | 1.83(0.89-3.76)        | 0.10             |                         |              |
| Indwelling catheter   | 91 (97.85%)        | 761 (94.89%)        | 2.37(0.58-9.63)        | 0.23             |                         |              |
| Tube feeding          | 67 (72.04%)        | 300 (37.41%)        | 2.64(1.67-4.18)        | <0.001           |                         |              |
| Nebulizer fiberoptic  | 64 (68.82%)        | 388 (48.38%)        | 1.42(0.92-2.20)        | 0.11             |                         |              |
| Bronchoscope          | 5 (5.38%)          | 18 (2.24%)          | 1.60(0.64-3.99)        | 0.31             |                         |              |
| Antimicrobial use     |                    |                     |                        |                  |                         |              |
| Cephalosporin         | <b>18 (19.35%)</b> | <b>213 (26.56%)</b> | <b>0.60(0.36-1.00)</b> | <b>0.051</b>     | <b>0.59(0.35-1.00)</b>  | <b>0.048</b> |
| Vancomycin            | 2 (2.15%)          | 33 (4.11%)          | 0.53(0.13-2.15)        | 0.38             |                         |              |
| Carbapenems           | <b>68 (73.12%)</b> | <b>319 (39.78%)</b> | <b>2.92(1.84-4.64)</b> | <b>&lt;0.001</b> | <b>2.11 (1.27-3.50)</b> | <b>0.004</b> |
| Fluoroquinolones      | 28 (30.11%)        | 144 (17.96%)        | 1.11(0.71-1.72)        | 0.65             |                         |              |
| Antifungal agents     | 16 (17.20%)        | 141 (17.58%)        | 0.82(0.48-1.39)        | 0.46             |                         |              |
| Cephameycins          | 15 (16.13%)        | 187 (23.32%)        | 0.56(0.33-0.98)        | 0.042            |                         |              |
| Lincomycin            | 4 (4.30%)          | 34 (4.24%)          | 0.90(0.34-2.44)        | 0.84             |                         |              |
| Tigecycline           | 7 (7.53%)          | 57 (7.11%)          | 0.91(0.43-1.96)        | 0.82             |                         |              |

COPD, chronic obstructive pulmonary disease. CVC, central venous catheter.

Variables with  $P < 0.05$  in the multivariate COX analysis are highlighted in bold.
